# Supplementary material for: Intra-Strain Genetic Variation of Platyfish (Xiphophorus maculatus) Strains Determines Tumorigenic Trajectory
Source: Front Genet. 2020 Oct 6;11:562594. doi: 10.3389/fgene.2020.562594 (PMC7573281; doi:10.3389/fgene.2020.562594)
Supplement: Supplementary Table 5 — Signaling pathways enriched by genetic variants and DEGs between JpA and JpB. [file Table_5.XLSX]

## Sheet: Supp.Table.4
Supplement Table 4: Genetic variants and their adjacent DEGs
Chr	chr.number	Variant PositionPosition	Ajacent Gene Model
NC_036443.1	1	11370780
NC_036443.1	1	15859181
NC_036443.1	1	18049859
NC_036443.1	1	18251589
NC_036443.1	1	18314836
NC_036443.1	1	18317756
NC_036443.1	1	18365801
NC_036443.1	1	18379380
NC_036443.1	1	18380169
NC_036443.1	1	18580333
NC_036443.1	1	18703435
NC_036443.1	1	18705691
NC_036443.1	1	18784223
NC_036443.1	1	18788680
NC_036443.1	1	19012279
NC_036443.1	1	19232764
NC_036443.1	1	19245542
NC_036443.1	1	19264821
NC_036443.1	1	19264873
NC_036443.1	1	19280739
NC_036443.1	1	19281043
NC_036443.1	1	19281124
NC_036443.1	1	19283038
NC_036443.1	1	19283385
NC_036443.1	1	19283753
NC_036443.1	1	19287374
NC_036443.1	1	19291241
NC_036443.1	1	19293718
NC_036443.1	1	19293743
NC_036443.1	1	19529931
NC_036443.1	1	19531480
NC_036443.1	1	19572263
NC_036443.1	1	19586886
NC_036443.1	1	19679224
NC_036443.1	1	19697859
NC_036443.1	1	19699188
NC_036443.1	1	19699348
NC_036443.1	1	19701853
NC_036443.1	1	19701907
NC_036443.1	1	19702077
NC_036443.1	1	19703996
NC_036443.1	1	19704730
NC_036443.1	1	19709738
NC_036443.1	1	19756850
NC_036443.1	1	19769016
NC_036443.1	1	19773338
NC_036443.1	1	19784871	102217083
NC_036443.1	1	19785180	102217083
NC_036443.1	1	19785250	102217083
NC_036443.1	1	19785988	102217083
NC_036443.1	1	19786925	102217083
NC_036443.1	1	19786946	102217083
NC_036443.1	1	19786976	102217083
NC_036443.1	1	19804662
NC_036443.1	1	19809510	102217083
NC_036443.1	1	19853523
NC_036443.1	1	19912693
NC_036443.1	1	19918540
NC_036443.1	1	19939590
NC_036443.1	1	19939616
NC_036443.1	1	19939713
NC_036443.1	1	19940085
NC_036443.1	1	19940134
NC_036443.1	1	19940147
NC_036443.1	1	19940276
NC_036443.1	1	19940298
NC_036443.1	1	19940347
NC_036443.1	1	19940460
NC_036443.1	1	19940529
NC_036443.1	1	19940664
NC_036443.1	1	19941557
NC_036443.1	1	19946721
NC_036443.1	1	19949251
NC_036443.1	1	19950526
NC_036443.1	1	19964253
NC_036443.1	1	19971575
NC_036443.1	1	20061520
NC_036443.1	1	20209056
NC_036443.1	1	20298399
NC_036443.1	1	20299604
NC_036443.1	1	20299686
NC_036443.1	1	20316246
NC_036443.1	1	20323695
NC_036443.1	1	20753667
NC_036443.1	1	20754073
NC_036443.1	1	21107274
NC_036443.1	1	21107433
NC_036443.1	1	21120401
NC_036443.1	1	21121278
NC_036443.1	1	21121643
NC_036443.1	1	21121918
NC_036443.1	1	21122623
NC_036443.1	1	21133910
NC_036443.1	1	21139882
NC_036443.1	1	21143969
NC_036443.1	1	21148359
NC_036443.1	1	21160669
NC_036443.1	1	21161052
NC_036443.1	1	21162299
NC_036443.1	1	21249036
NC_036443.1	1	21250625
NC_036443.1	1	21326294
NC_036443.1	1	21326447
NC_036443.1	1	21376801
NC_036443.1	1	21383274
NC_036443.1	1	21388015
NC_036443.1	1	21389713
NC_036443.1	1	21389895
NC_036443.1	1	21390048
NC_036443.1	1	21390405
NC_036443.1	1	21390727
NC_036443.1	1	21390782
NC_036443.1	1	21390808
NC_036443.1	1	21390851
NC_036443.1	1	21390875
NC_036443.1	1	21391116
NC_036443.1	1	21391242
NC_036443.1	1	21391380
NC_036443.1	1	21391448
NC_036443.1	1	21391461
NC_036443.1	1	21391894
NC_036443.1	1	21392892
NC_036443.1	1	21393045
NC_036443.1	1	21393783
NC_036443.1	1	21394383
NC_036443.1	1	21394932
NC_036443.1	1	21394941
NC_036443.1	1	21436185
NC_036443.1	1	21438499
NC_036443.1	1	21461867
NC_036443.1	1	21469038
NC_036443.1	1	24608573
NC_036443.1	1	32173076
NC_036444.1	2	7001205
NC_036444.1	2	18099010
NC_036444.1	2	18099568
NC_036444.1	2	18105859
NC_036444.1	2	18108415
NC_036444.1	2	18227146
NC_036444.1	2	18230337
NC_036444.1	2	18232577
NC_036444.1	2	18240994
NC_036444.1	2	18256285
NC_036444.1	2	18256619
NC_036444.1	2	18257865
NC_036444.1	2	18258808
NC_036444.1	2	18259578
NC_036444.1	2	18259671
NC_036444.1	2	18259701
NC_036444.1	2	18259735
NC_036444.1	2	18259741
NC_036444.1	2	18260433
NC_036444.1	2	18260466
NC_036444.1	2	18260915
NC_036444.1	2	18261504
NC_036444.1	2	18261566
NC_036444.1	2	18262604
NC_036444.1	2	18262718
NC_036444.1	2	18262856
NC_036444.1	2	18263000
NC_036444.1	2	18263435
NC_036444.1	2	18263464
NC_036444.1	2	18263554
NC_036444.1	2	18263599
NC_036444.1	2	18263618
NC_036444.1	2	18264936
NC_036444.1	2	18265055
NC_036444.1	2	18265273
NC_036444.1	2	18265361
NC_036444.1	2	18265380
NC_036444.1	2	18265709
NC_036444.1	2	18265747
NC_036444.1	2	18265955
NC_036444.1	2	19865329
NC_036445.1	3	548054
NC_036445.1	3	564102
NC_036445.1	3	11574313
NC_036445.1	3	12773597
NC_036445.1	3	14825036
NC_036445.1	3	18587457
NC_036445.1	3	20562434
NC_036445.1	3	29362097
NC_036446.1	4	5136807
NC_036446.1	4	5136864
NC_036446.1	4	5138671
NC_036446.1	4	5145835
NC_036446.1	4	5180548
NC_036446.1	4	5180558
NC_036446.1	4	5202058
NC_036446.1	4	5203504
NC_036446.1	4	5204620
NC_036446.1	4	5206911
NC_036446.1	4	5207298
NC_036446.1	4	5207508
NC_036446.1	4	5362789
NC_036446.1	4	5434833
NC_036446.1	4	11113402
NC_036446.1	4	11114021
NC_036446.1	4	11118568
NC_036446.1	4	11119628
NC_036446.1	4	11812714
NC_036446.1	4	11817838
NC_036446.1	4	11820706
NC_036446.1	4	11821800
NC_036446.1	4	11843039
NC_036446.1	4	11843092
NC_036446.1	4	11846087
NC_036446.1	4	12002866
NC_036446.1	4	12158080
NC_036446.1	4	12166459
NC_036446.1	4	12174858
NC_036446.1	4	12176171
NC_036446.1	4	12184067
NC_036446.1	4	12200557
NC_036446.1	4	12214512
NC_036446.1	4	12214518
NC_036446.1	4	12224233
NC_036446.1	4	12225158
NC_036446.1	4	12996161
NC_036446.1	4	13000807
NC_036446.1	4	13001042
NC_036446.1	4	13004102
NC_036446.1	4	13005592
NC_036446.1	4	13010671
NC_036446.1	4	13014150
NC_036446.1	4	13039277
NC_036446.1	4	13039331
NC_036446.1	4	13039459
NC_036446.1	4	13042024
NC_036446.1	4	13044878
NC_036446.1	4	20635378
NC_036446.1	4	21436694
NC_036446.1	4	21470479
NC_036446.1	4	21470605
NC_036446.1	4	21470722
NC_036446.1	4	21470736
NC_036446.1	4	21470929
NC_036446.1	4	21471131
NC_036446.1	4	21471431
NC_036446.1	4	21471484
NC_036446.1	4	21471509
NC_036446.1	4	21472418
NC_036446.1	4	21472546
NC_036446.1	4	21493893
NC_036446.1	4	21496596
NC_036446.1	4	21501965
NC_036446.1	4	21503514
NC_036446.1	4	21503523
NC_036446.1	4	21505875
NC_036446.1	4	21506743
NC_036446.1	4	21517504
NC_036446.1	4	21517568
NC_036446.1	4	21525976
NC_036446.1	4	26961709
NC_036448.1	6	9925
NC_036448.1	6	91300
NC_036448.1	6	189774
NC_036448.1	6	230636
NC_036448.1	6	256531
NC_036448.1	6	257861
NC_036448.1	6	259845
NC_036448.1	6	282673
NC_036448.1	6	308403
NC_036448.1	6	309049
NC_036448.1	6	413138
NC_036448.1	6	420483
NC_036448.1	6	460641
NC_036448.1	6	510676
NC_036448.1	6	521639
NC_036448.1	6	521696
NC_036448.1	6	522724
NC_036448.1	6	523211
NC_036448.1	6	523890
NC_036448.1	6	528127
NC_036448.1	6	625130
NC_036448.1	6	630956
NC_036448.1	6	634343
NC_036448.1	6	635632
NC_036448.1	6	669380
NC_036448.1	6	670456
NC_036448.1	6	670636
NC_036448.1	6	671993
NC_036448.1	6	677620
NC_036448.1	6	713885
NC_036448.1	6	714583
NC_036448.1	6	716022
NC_036448.1	6	716252
NC_036448.1	6	717002
NC_036448.1	6	717479
NC_036448.1	6	720723
NC_036448.1	6	721038
NC_036448.1	6	721372
NC_036448.1	6	940065
NC_036448.1	6	940269
NC_036448.1	6	949284
NC_036448.1	6	953096
NC_036448.1	6	953498
NC_036448.1	6	953691
NC_036448.1	6	986131
NC_036448.1	6	991783
NC_036448.1	6	993426
NC_036448.1	6	994586
NC_036448.1	6	998985
NC_036448.1	6	1002123
NC_036448.1	6	1002132
NC_036448.1	6	1015304
NC_036448.1	6	1016631
NC_036448.1	6	1018066
NC_036448.1	6	1080788
NC_036448.1	6	1083557
NC_036448.1	6	1086965
NC_036448.1	6	1087513
NC_036448.1	6	1087553
NC_036448.1	6	1094736
NC_036448.1	6	1095263
NC_036448.1	6	1095404
NC_036448.1	6	1101053
NC_036448.1	6	1104079
NC_036448.1	6	1110333
NC_036448.1	6	1178442
NC_036448.1	6	1180562
NC_036448.1	6	1200975
NC_036448.1	6	1209221
NC_036448.1	6	1210215
NC_036448.1	6	1210545
NC_036448.1	6	1210572
NC_036448.1	6	1211543
NC_036448.1	6	1214689
NC_036448.1	6	1221413
NC_036448.1	6	1518215
NC_036448.1	6	1519898
NC_036448.1	6	1545748
NC_036448.1	6	1573054
NC_036448.1	6	1585648
NC_036448.1	6	1618495
NC_036448.1	6	1773342
NC_036448.1	6	1774056
NC_036448.1	6	1790074
NC_036448.1	6	1913280
NC_036448.1	6	1926169
NC_036448.1	6	1974629
NC_036448.1	6	2048314
NC_036448.1	6	2050070
NC_036448.1	6	2054088
NC_036448.1	6	2083519
NC_036448.1	6	2213336
NC_036448.1	6	2214745
NC_036448.1	6	2215131
NC_036448.1	6	2215968
NC_036448.1	6	2216813
NC_036448.1	6	2218728
NC_036448.1	6	2219932
NC_036448.1	6	2220353
NC_036448.1	6	2220440
NC_036448.1	6	2221708
NC_036448.1	6	2222617
NC_036448.1	6	2223281
NC_036448.1	6	2226503
NC_036448.1	6	2226791
NC_036448.1	6	2229176
NC_036448.1	6	2229827
NC_036448.1	6	2234087
NC_036448.1	6	2253449
NC_036448.1	6	2266582	102218168
NC_036448.1	6	2269732	102218168
NC_036448.1	6	2270114	102219772
NC_036448.1	6	2287087
NC_036448.1	6	2326627
NC_036448.1	6	2383765
NC_036448.1	6	2410347
NC_036448.1	6	2411663
NC_036448.1	6	2417939
NC_036448.1	6	2501201
NC_036448.1	6	2502450
NC_036448.1	6	2554152
NC_036448.1	6	2554194
NC_036448.1	6	2555018
NC_036448.1	6	2687926
NC_036448.1	6	2689991
NC_036448.1	6	2743515
NC_036448.1	6	2761391
NC_036448.1	6	2878156
NC_036448.1	6	2883791
NC_036448.1	6	2941095
NC_036448.1	6	2941877
NC_036448.1	6	2946805
NC_036448.1	6	2947753
NC_036448.1	6	2950487
NC_036448.1	6	2951344
NC_036448.1	6	2951513
NC_036448.1	6	2951554
NC_036448.1	6	2952217
NC_036448.1	6	2959068
NC_036448.1	6	2959257
NC_036448.1	6	2959389
NC_036448.1	6	2959856
NC_036448.1	6	2985111
NC_036448.1	6	2985734
NC_036448.1	6	3026393
NC_036448.1	6	3030690
NC_036448.1	6	3031102
NC_036448.1	6	3032953
NC_036448.1	6	3148754
NC_036448.1	6	3155519
NC_036448.1	6	3156642
NC_036448.1	6	3156747
NC_036448.1	6	3156977
NC_036448.1	6	3157071
NC_036448.1	6	3157134
NC_036448.1	6	3157247
NC_036448.1	6	3157311
NC_036448.1	6	3157344
NC_036448.1	6	3157971
NC_036448.1	6	3158123
NC_036448.1	6	3158167
NC_036448.1	6	3158306
NC_036448.1	6	3158333
NC_036448.1	6	3158392
NC_036448.1	6	3158482
NC_036448.1	6	3158825
NC_036448.1	6	3165848
NC_036448.1	6	3165967
NC_036448.1	6	3177373
NC_036448.1	6	3258369
NC_036448.1	6	3290926
NC_036448.1	6	3327428
NC_036448.1	6	3329049
NC_036448.1	6	3329056
NC_036448.1	6	3330932
NC_036448.1	6	3340452
NC_036448.1	6	3352620
NC_036448.1	6	3385303
NC_036448.1	6	3400577
NC_036448.1	6	3404954
NC_036448.1	6	3405307
NC_036448.1	6	3416109
NC_036448.1	6	3416136
NC_036448.1	6	3416284
NC_036448.1	6	3421500
NC_036448.1	6	3427228
NC_036448.1	6	3427301
NC_036448.1	6	3428391
NC_036448.1	6	3437349
NC_036448.1	6	3437956
NC_036448.1	6	3439424
NC_036448.1	6	3459802
NC_036448.1	6	3475132
NC_036448.1	6	3477551
NC_036448.1	6	3483300
NC_036448.1	6	3486115
NC_036448.1	6	3502623
NC_036448.1	6	3505525
NC_036448.1	6	3519341
NC_036448.1	6	3559933
NC_036448.1	6	3561065
NC_036448.1	6	3561582
NC_036448.1	6	3613776
NC_036448.1	6	3614405
NC_036448.1	6	3617850
NC_036448.1	6	3618124
NC_036448.1	6	3618132
NC_036448.1	6	3623356
NC_036448.1	6	3624271
NC_036448.1	6	3624299
NC_036448.1	6	3624809
NC_036448.1	6	3626633
NC_036448.1	6	3628496
NC_036448.1	6	3637865
NC_036448.1	6	3639045
NC_036448.1	6	3662484
NC_036448.1	6	3692736
NC_036448.1	6	3694467
NC_036448.1	6	3697193
NC_036448.1	6	3698253
NC_036448.1	6	3716590
NC_036448.1	6	3731958
NC_036448.1	6	3783200
NC_036448.1	6	3788606
NC_036448.1	6	3894209
NC_036448.1	6	3896207
NC_036448.1	6	3903097
NC_036448.1	6	3904591
NC_036448.1	6	3904594
NC_036448.1	6	3905843
NC_036448.1	6	3907234
NC_036448.1	6	3908968
NC_036448.1	6	3909045
NC_036448.1	6	3922418
NC_036448.1	6	3931648	111608953
NC_036448.1	6	3945136
NC_036448.1	6	3954518
NC_036448.1	6	3957231
NC_036448.1	6	3960019
NC_036448.1	6	3982324
NC_036448.1	6	3991247
NC_036448.1	6	3994756
NC_036448.1	6	3995102
NC_036448.1	6	3995811
NC_036448.1	6	4007230
NC_036448.1	6	4429353
NC_036448.1	6	4432309
NC_036448.1	6	4436072
NC_036448.1	6	4439476
NC_036448.1	6	4441357
NC_036448.1	6	4441418
NC_036448.1	6	4445893
NC_036448.1	6	4451145
NC_036448.1	6	4456873
NC_036448.1	6	4464758
NC_036448.1	6	4468908
NC_036448.1	6	4470284
NC_036448.1	6	4493119
NC_036448.1	6	4493656
NC_036448.1	6	4512259
NC_036448.1	6	4527619
NC_036448.1	6	4588576
NC_036448.1	6	4621298
NC_036448.1	6	4789720
NC_036448.1	6	4913205
NC_036448.1	6	4940648
NC_036448.1	6	4942133
NC_036448.1	6	4942334
NC_036448.1	6	4942471
NC_036448.1	6	4944006
NC_036448.1	6	4944192
NC_036448.1	6	4944907
NC_036448.1	6	4971027
NC_036448.1	6	4971812
NC_036448.1	6	4975735
NC_036448.1	6	4989886
NC_036448.1	6	4990044
NC_036448.1	6	4990068
NC_036448.1	6	4990135
NC_036448.1	6	4993236
NC_036448.1	6	4993832
NC_036448.1	6	4995090
NC_036448.1	6	4995806
NC_036448.1	6	4995845
NC_036448.1	6	4995903
NC_036448.1	6	4995937
NC_036448.1	6	4996282
NC_036448.1	6	4996385
NC_036448.1	6	4996844
NC_036448.1	6	5000696
NC_036448.1	6	5000714
NC_036448.1	6	5001580
NC_036448.1	6	5001738
NC_036448.1	6	5001882
NC_036448.1	6	5001888
NC_036448.1	6	5002195
NC_036448.1	6	5002197
NC_036448.1	6	5002257
NC_036448.1	6	5075912
NC_036448.1	6	5076335
NC_036448.1	6	5076429
NC_036448.1	6	5077734
NC_036448.1	6	5124686
NC_036448.1	6	5148057
NC_036448.1	6	5151432
NC_036448.1	6	5222687	102218168
NC_036448.1	6	5247236	102218168
NC_036448.1	6	7044136
NC_036448.1	6	7163663
NC_036448.1	6	7165561
NC_036448.1	6	7496987
NC_036448.1	6	7511734
NC_036448.1	6	7515354
NC_036448.1	6	7516072
NC_036448.1	6	7516474
NC_036448.1	6	7524247
NC_036448.1	6	7615131
NC_036448.1	6	25052068
NC_036449.1	7	1730596
NC_036449.1	7	19235742
NC_036449.1	7	21561741
NC_036450.1	8	13297187
NC_036451.1	9	2378971
NC_036451.1	9	7100929
NC_036451.1	9	16834433
NC_036451.1	9	18228226
NC_036451.1	9	18231035
NC_036451.1	9	18232687
NC_036451.1	9	18285517
NC_036451.1	9	18352300
NC_036451.1	9	18352360
NC_036451.1	9	18353061
NC_036451.1	9	18354404
NC_036451.1	9	18354407
NC_036451.1	9	18356064
NC_036451.1	9	18356539
NC_036451.1	9	18357330
NC_036451.1	9	18358098
NC_036451.1	9	18358692
NC_036451.1	9	18358857
NC_036451.1	9	18360296
NC_036451.1	9	18360356
NC_036451.1	9	18360567
NC_036451.1	9	18360716
NC_036451.1	9	18360780
NC_036451.1	9	18360796
NC_036451.1	9	18361788
NC_036451.1	9	18361794
NC_036451.1	9	18361827
NC_036451.1	9	18362220
NC_036451.1	9	18362546
NC_036451.1	9	18362564
NC_036451.1	9	18363817
NC_036451.1	9	18364171
NC_036451.1	9	18365554
NC_036451.1	9	18365572
NC_036451.1	9	18365581
NC_036451.1	9	18365785
NC_036451.1	9	18365844
NC_036451.1	9	18365855
NC_036451.1	9	18365872
NC_036451.1	9	18366184
NC_036451.1	9	18366305
NC_036451.1	9	18366311
NC_036451.1	9	18366834
NC_036451.1	9	18366960
NC_036451.1	9	18367138
NC_036451.1	9	18367962
NC_036451.1	9	18368051
NC_036451.1	9	18368304
NC_036451.1	9	18368376
NC_036451.1	9	18368400
NC_036451.1	9	18369528
NC_036451.1	9	18369563
NC_036451.1	9	18369691
NC_036451.1	9	18370362
NC_036451.1	9	18370690
NC_036451.1	9	18370698
NC_036451.1	9	18370710
NC_036451.1	9	18370731
NC_036451.1	9	18370774
NC_036451.1	9	18370848
NC_036451.1	9	18370902
NC_036451.1	9	18370959
NC_036451.1	9	18371184
NC_036451.1	9	18371241
NC_036451.1	9	18371281
NC_036451.1	9	18371292
NC_036451.1	9	18371730
NC_036451.1	9	18371756
NC_036451.1	9	18371878
NC_036451.1	9	18372186
NC_036451.1	9	18372195
NC_036451.1	9	18372366
NC_036451.1	9	18372729
NC_036451.1	9	18372750
NC_036451.1	9	18372754
NC_036451.1	9	18372898
NC_036451.1	9	18373000
NC_036451.1	9	18373017
NC_036451.1	9	18373020
NC_036451.1	9	18373195
NC_036451.1	9	18377901
NC_036451.1	9	18379557
NC_036451.1	9	18379811
NC_036451.1	9	18379817
NC_036451.1	9	18379903
NC_036451.1	9	18379937
NC_036451.1	9	18380313
NC_036451.1	9	18381796
NC_036451.1	9	18381847
NC_036451.1	9	18381964
NC_036451.1	9	18382427
NC_036451.1	9	18382604
NC_036451.1	9	18383031
NC_036451.1	9	18383646
NC_036451.1	9	18383881
NC_036451.1	9	18384506
NC_036451.1	9	18397657
NC_036451.1	9	18397768
NC_036451.1	9	18398197
NC_036451.1	9	18398565
NC_036451.1	9	18414195	102222495
NC_036451.1	9	18563036
NC_036451.1	9	18594972
NC_036451.1	9	18639256
NC_036451.1	9	18639284
NC_036451.1	9	18657916
NC_036451.1	9	18660087
NC_036451.1	9	18662143
NC_036451.1	9	18664694
NC_036451.1	9	18916297
NC_036451.1	9	18922578
NC_036451.1	9	18960232
NC_036451.1	9	19005987
NC_036451.1	9	19010161
NC_036451.1	9	19015130
NC_036451.1	9	19015429
NC_036451.1	9	19015704
NC_036451.1	9	19016422
NC_036451.1	9	19022303
NC_036451.1	9	19106242
NC_036451.1	9	19146220
NC_036451.1	9	19147405
NC_036451.1	9	19152842
NC_036451.1	9	19154696
NC_036451.1	9	19233181
NC_036451.1	9	19500889
NC_036451.1	9	19501849
NC_036451.1	9	19516775
NC_036451.1	9	23113351
NC_036452.1	10	1810803
NC_036452.1	10	4092483
NC_036452.1	10	6501117
NC_036452.1	10	9763300
NC_036452.1	10	24993812
NC_036453.1	11	4104943
NC_036453.1	11	4106206
NC_036453.1	11	4108846
NC_036453.1	11	4108947
NC_036453.1	11	4109068
NC_036453.1	11	4109169
NC_036453.1	11	4135493
NC_036453.1	11	4141627
NC_036453.1	11	4303807
NC_036453.1	11	4316729
NC_036453.1	11	4324376
NC_036453.1	11	4354417
NC_036453.1	11	4354559
NC_036453.1	11	4379162
NC_036453.1	11	4379538
NC_036453.1	11	4381209
NC_036453.1	11	4381269
NC_036453.1	11	4381614
NC_036453.1	11	4382841
NC_036453.1	11	4383189
NC_036453.1	11	4445418
NC_036453.1	11	4464885
NC_036453.1	11	4473217
NC_036453.1	11	4504545
NC_036453.1	11	4512900
NC_036453.1	11	4547144
NC_036453.1	11	4562626
NC_036453.1	11	4564054
NC_036453.1	11	4565337
NC_036453.1	11	4568193
NC_036453.1	11	4571286
NC_036453.1	11	4573147
NC_036453.1	11	4573804
NC_036453.1	11	4615439
NC_036453.1	11	4616810
NC_036453.1	11	5662766
NC_036453.1	11	5662910
NC_036453.1	11	5682087
NC_036453.1	11	5716886
NC_036453.1	11	5721033
NC_036453.1	11	5729233
NC_036453.1	11	5729905
NC_036453.1	11	5752121
NC_036453.1	11	5752162
NC_036453.1	11	5761920
NC_036453.1	11	5762717
NC_036453.1	11	5762896
NC_036453.1	11	5764074
NC_036453.1	11	5768712
NC_036453.1	11	5806706
NC_036453.1	11	5809314
NC_036453.1	11	5809874
NC_036453.1	11	5811902
NC_036453.1	11	6497594
NC_036453.1	11	6499009
NC_036453.1	11	6502269
NC_036453.1	11	6502769
NC_036453.1	11	6503041
NC_036453.1	11	6534601	102224694
NC_036453.1	11	6570271	102218045
NC_036453.1	11	6575098	102218045
NC_036453.1	11	6576425	102224438
NC_036453.1	11	6578255	102224438
NC_036453.1	11	6589539
NC_036453.1	11	6597157
NC_036453.1	11	6597446
NC_036453.1	11	6599463
NC_036453.1	11	6600578
NC_036453.1	11	6658223
NC_036453.1	11	6673428
NC_036453.1	11	6673705
NC_036453.1	11	6673745
NC_036453.1	11	6674181
NC_036453.1	11	6674353
NC_036453.1	11	6674948
NC_036453.1	11	6675003
NC_036453.1	11	6675038
NC_036453.1	11	6675071
NC_036453.1	11	6675524
NC_036453.1	11	6714635
NC_036453.1	11	6715546
NC_036453.1	11	6723350
NC_036453.1	11	6745171
NC_036453.1	11	6745696
NC_036453.1	11	6746916
NC_036453.1	11	6746920
NC_036453.1	11	6751698
NC_036453.1	11	6755961
NC_036453.1	11	6761619
NC_036453.1	11	6766856	102223152
NC_036453.1	11	6767084	102223152
NC_036453.1	11	6767182	102223152
NC_036453.1	11	6767186	102223152
NC_036453.1	11	6767599	102223152
NC_036453.1	11	6767658	102223152
NC_036453.1	11	6767760	102223152
NC_036453.1	11	6771282	102218045
NC_036453.1	11	6772193	102218045
NC_036453.1	11	6772543	102218045
NC_036453.1	11	6780102
NC_036453.1	11	6816215
NC_036453.1	11	6816726
NC_036453.1	11	6816761
NC_036453.1	11	6817015
NC_036453.1	11	6828062
NC_036453.1	11	6828139
NC_036453.1	11	6828304
NC_036453.1	11	6828374
NC_036453.1	11	6828407
NC_036453.1	11	6828415
NC_036453.1	11	6828429
NC_036453.1	11	6828492
NC_036453.1	11	6829123
NC_036453.1	11	6829128
NC_036453.1	11	6855536
NC_036453.1	11	6855935
NC_036453.1	11	6871305
NC_036453.1	11	6918780
NC_036453.1	11	6920843
NC_036453.1	11	6922701
NC_036453.1	11	6951983
NC_036453.1	11	7039855
NC_036453.1	11	7042405
NC_036453.1	11	7043612
NC_036453.1	11	7044327
NC_036453.1	11	7044555
NC_036453.1	11	7045028
NC_036453.1	11	7052658
NC_036453.1	11	7055142
NC_036453.1	11	7055710
NC_036453.1	11	7056822
NC_036453.1	11	7057177
NC_036453.1	11	7057191
NC_036453.1	11	7057232
NC_036453.1	11	7058135
NC_036453.1	11	7502547
NC_036453.1	11	7502850
NC_036453.1	11	7504485
NC_036453.1	11	7504498
NC_036453.1	11	7517163
NC_036453.1	11	7588928
NC_036453.1	11	7642607
NC_036453.1	11	7645114
NC_036453.1	11	7657515
NC_036453.1	11	7657972
NC_036453.1	11	7659483
NC_036453.1	11	7684230
NC_036453.1	11	7686354
NC_036453.1	11	7686423
NC_036453.1	11	7686433
NC_036453.1	11	7836003
NC_036453.1	11	7839369
NC_036453.1	11	7867162
NC_036453.1	11	7895321
NC_036453.1	11	7922630
NC_036453.1	11	7924915
NC_036453.1	11	7925085
NC_036453.1	11	7925700
NC_036453.1	11	7938068
NC_036453.1	11	7956178
NC_036453.1	11	7966773
NC_036453.1	11	7966850
NC_036453.1	11	8003636
NC_036453.1	11	8096427
NC_036453.1	11	8097732
NC_036453.1	11	8098010
NC_036453.1	11	8102338
NC_036453.1	11	8105446
NC_036453.1	11	8138664
NC_036453.1	11	8143890
NC_036453.1	11	8148252
NC_036453.1	11	8150097
NC_036453.1	11	8172211
NC_036453.1	11	8184316
NC_036453.1	11	8208480
NC_036453.1	11	8210076
NC_036453.1	11	8258552
NC_036453.1	11	8342239
NC_036453.1	11	8352167
NC_036453.1	11	8361585
NC_036453.1	11	8410609
NC_036453.1	11	8410821
NC_036453.1	11	8414429
NC_036453.1	11	8414773
NC_036453.1	11	8431636
NC_036453.1	11	8431637
NC_036453.1	11	8436393
NC_036453.1	11	8437944
NC_036453.1	11	8521911
NC_036453.1	11	8544802
NC_036453.1	11	8546428
NC_036453.1	11	8546472
NC_036453.1	11	8575016
NC_036453.1	11	8612698
NC_036453.1	11	8623521
NC_036453.1	11	8625109
NC_036453.1	11	23415923
NC_036453.1	11	23418338
NC_036453.1	11	23489298
NC_036453.1	11	23497751
NC_036453.1	11	23502474
NC_036453.1	11	23502808
NC_036453.1	11	23503269
NC_036453.1	11	23512097
NC_036453.1	11	23516105
NC_036453.1	11	23516293
NC_036453.1	11	23517100
NC_036453.1	11	23517202
NC_036453.1	11	23517305
NC_036453.1	11	23688514
NC_036453.1	11	23690813
NC_036453.1	11	23691545
NC_036453.1	11	23692652
NC_036453.1	11	23699038
NC_036453.1	11	23699753
NC_036453.1	11	23699920
NC_036453.1	11	23700172
NC_036453.1	11	23700318
NC_036453.1	11	23700343
NC_036453.1	11	23700448
NC_036453.1	11	23700509
NC_036453.1	11	23702384
NC_036453.1	11	23713586
NC_036453.1	11	23728190
NC_036453.1	11	23731672
NC_036453.1	11	23743862
NC_036453.1	11	24033382
NC_036453.1	11	24034501
NC_036453.1	11	24038762
NC_036453.1	11	24038804
NC_036453.1	11	24038960
NC_036453.1	11	24039226
NC_036453.1	11	24039845
NC_036453.1	11	24040076
NC_036453.1	11	24043350
NC_036453.1	11	24046198
NC_036453.1	11	24047297
NC_036453.1	11	24048141
NC_036453.1	11	24048402
NC_036453.1	11	24048981
NC_036453.1	11	24049397
NC_036453.1	11	24050024
NC_036453.1	11	24052829
NC_036453.1	11	24053401
NC_036453.1	11	24066682
NC_036453.1	11	24067732
NC_036453.1	11	24067958
NC_036453.1	11	24073149
NC_036453.1	11	24131890
NC_036453.1	11	24132422
NC_036453.1	11	24144010
NC_036453.1	11	24195965
NC_036453.1	11	24248722
NC_036453.1	11	24248854
NC_036453.1	11	24248904
NC_036453.1	11	24249051
NC_036453.1	11	24249239
NC_036453.1	11	24249306
NC_036453.1	11	24249378
NC_036453.1	11	24250162
NC_036453.1	11	24250383
NC_036453.1	11	24254303
NC_036453.1	11	24255432
NC_036453.1	11	24260277
NC_036453.1	11	24263641
NC_036453.1	11	24263676
NC_036453.1	11	24266795
NC_036453.1	11	24273373
NC_036453.1	11	24273436
NC_036453.1	11	24276950
NC_036453.1	11	24283740
NC_036453.1	11	24288063
NC_036453.1	11	24288517
NC_036453.1	11	24293020
NC_036453.1	11	24305687
NC_036453.1	11	24305718
NC_036453.1	11	24306007
NC_036453.1	11	24431355
NC_036453.1	11	24431422
NC_036453.1	11	24433388
NC_036453.1	11	24434259
NC_036453.1	11	24590733
NC_036453.1	11	24590880
NC_036453.1	11	24591215
NC_036453.1	11	24591569
NC_036453.1	11	24591660
NC_036453.1	11	24593764
NC_036453.1	11	24604342
NC_036453.1	11	24607135
NC_036453.1	11	24608598
NC_036453.1	11	24639793
NC_036453.1	11	24653289
NC_036453.1	11	24866708
NC_036453.1	11	24867455
NC_036453.1	11	24867465
NC_036453.1	11	24868101
NC_036453.1	11	24940407
NC_036453.1	11	24941514
NC_036453.1	11	24941697
NC_036453.1	11	24942816
NC_036453.1	11	24942901
NC_036453.1	11	24942911
NC_036453.1	11	24955877
NC_036453.1	11	24956034
NC_036453.1	11	25019394
NC_036453.1	11	25032786
NC_036453.1	11	25035654
NC_036453.1	11	25059634
NC_036453.1	11	25059670
NC_036453.1	11	25059704
NC_036453.1	11	25059833
NC_036453.1	11	25059921
NC_036453.1	11	25060303
NC_036453.1	11	25060389
NC_036453.1	11	25060566
NC_036453.1	11	25060703
NC_036453.1	11	25060906
NC_036453.1	11	25061242
NC_036453.1	11	25063616
NC_036453.1	11	25094688
NC_036453.1	11	25186474
NC_036453.1	11	25189512
NC_036453.1	11	25189690
NC_036453.1	11	25190323
NC_036453.1	11	25191785
NC_036453.1	11	25193116
NC_036453.1	11	25193206
NC_036453.1	11	25501485
NC_036454.1	12	18394640
NC_036454.1	12	18450764
NC_036454.1	12	18452128
NC_036454.1	12	18460333
NC_036454.1	12	18460602
NC_036454.1	12	18460606
NC_036454.1	12	18464101
NC_036454.1	12	18464631
NC_036454.1	12	18469988
NC_036454.1	12	18477962
NC_036454.1	12	18478532
NC_036454.1	12	18479203
NC_036454.1	12	18481746
NC_036454.1	12	18489446
NC_036454.1	12	18489539
NC_036454.1	12	18489719
NC_036454.1	12	18490027
NC_036454.1	12	18493460
NC_036454.1	12	18516508
NC_036454.1	12	18524629
NC_036454.1	12	18525342
NC_036454.1	12	18525887
NC_036454.1	12	18533264
NC_036454.1	12	18535676
NC_036454.1	12	18603022
NC_036454.1	12	18610242
NC_036454.1	12	18611396
NC_036454.1	12	18615024
NC_036454.1	12	18616696
NC_036454.1	12	18616941
NC_036454.1	12	18631238
NC_036454.1	12	18641573
NC_036454.1	12	18642739
NC_036454.1	12	18648548
NC_036454.1	12	18648554
NC_036454.1	12	18649857
NC_036454.1	12	18652520
NC_036454.1	12	18652841
NC_036454.1	12	18652876
NC_036454.1	12	18652964
NC_036454.1	12	18654026
NC_036454.1	12	18654033
NC_036454.1	12	18654396
NC_036454.1	12	18654495
NC_036454.1	12	18657138
NC_036454.1	12	18658664
NC_036454.1	12	18666402
NC_036454.1	12	18705616
NC_036454.1	12	18706819
NC_036454.1	12	18707604
NC_036454.1	12	18713139
NC_036454.1	12	18716441
NC_036454.1	12	18717126
NC_036454.1	12	18719253
NC_036454.1	12	18720645
NC_036454.1	12	18721674
NC_036454.1	12	18721970
NC_036454.1	12	18722552
NC_036454.1	12	18722559
NC_036454.1	12	18722648
NC_036454.1	12	18756313
NC_036454.1	12	18756315
NC_036454.1	12	18759224
NC_036454.1	12	18761579
NC_036454.1	12	18770952
NC_036454.1	12	18772817
NC_036454.1	12	18773047
NC_036454.1	12	18773060
NC_036454.1	12	18773068
NC_036454.1	12	18773074
NC_036454.1	12	18773746
NC_036454.1	12	18773939
NC_036454.1	12	18774050
NC_036454.1	12	18774180
NC_036454.1	12	18775590
NC_036454.1	12	18775668
NC_036454.1	12	18776429
NC_036454.1	12	18776458
NC_036454.1	12	18776782
NC_036454.1	12	18777169
NC_036454.1	12	18777224
NC_036454.1	12	18777265
NC_036454.1	12	18777387
NC_036454.1	12	18777432
NC_036454.1	12	18777558
NC_036454.1	12	18777588
NC_036454.1	12	18777603
NC_036454.1	12	18777696
NC_036454.1	12	18777858
NC_036454.1	12	18778253
NC_036454.1	12	18778271
NC_036454.1	12	18780040
NC_036454.1	12	18782541
NC_036454.1	12	18784426
NC_036454.1	12	18787227
NC_036454.1	12	18787234
NC_036454.1	12	18797536
NC_036454.1	12	18976143
NC_036454.1	12	18976774
NC_036454.1	12	18980335
NC_036454.1	12	18981765
NC_036454.1	12	18996930
NC_036454.1	12	18997041
NC_036454.1	12	18997206
NC_036454.1	12	18997303
NC_036454.1	12	18997389
NC_036454.1	12	18997451
NC_036454.1	12	18997607
NC_036454.1	12	18997610
NC_036454.1	12	18997816
NC_036454.1	12	18997825
NC_036454.1	12	18997875
NC_036454.1	12	18998018
NC_036454.1	12	18999095
NC_036454.1	12	18999191
NC_036454.1	12	19000283
NC_036454.1	12	19000466
NC_036454.1	12	19000472
NC_036454.1	12	19001355
NC_036454.1	12	19001409
NC_036454.1	12	19001887
NC_036454.1	12	19001997
NC_036454.1	12	19002193
NC_036454.1	12	19002287
NC_036454.1	12	19002343
NC_036454.1	12	19002967
NC_036454.1	12	19003062
NC_036454.1	12	19003202
NC_036454.1	12	19003260
NC_036454.1	12	19003793
NC_036454.1	12	19003813
NC_036454.1	12	19003925
NC_036454.1	12	19047150
NC_036454.1	12	19049969
NC_036454.1	12	19058812
NC_036454.1	12	19090954
NC_036454.1	12	19092955
NC_036454.1	12	19094294
NC_036454.1	12	19096118
NC_036454.1	12	19105336
NC_036454.1	12	19106094
NC_036454.1	12	19106100
NC_036454.1	12	19129227
NC_036454.1	12	19143336
NC_036454.1	12	19156587
NC_036454.1	12	19157548
NC_036455.1	13	20337656
NC_036455.1	13	21043533
NC_036455.1	13	21789253
NC_036455.1	13	21789420
NC_036455.1	13	21792406
NC_036455.1	13	21798816
NC_036455.1	13	21799028
NC_036455.1	13	21983530
NC_036455.1	13	21989274
NC_036455.1	13	21990353
NC_036455.1	13	21992831
NC_036455.1	13	21992881
NC_036455.1	13	21992942
NC_036455.1	13	21992969
NC_036455.1	13	21992989
NC_036455.1	13	21993047
NC_036455.1	13	21993466
NC_036455.1	13	21993544
NC_036455.1	13	21994375
NC_036455.1	13	21994388
NC_036455.1	13	21994494
NC_036455.1	13	21994616
NC_036455.1	13	22001635
NC_036455.1	13	22010783	102216382
NC_036455.1	13	22014796	102216382
NC_036455.1	13	22021106	102216382
NC_036455.1	13	22031173	102216382
NC_036455.1	13	22031341	102216382
NC_036455.1	13	22031829	102216382
NC_036455.1	13	22031868	102216382
NC_036455.1	13	22041263	111610529
NC_036455.1	13	22041403	111610529
NC_036455.1	13	22041459	111610529
NC_036455.1	13	22042539	111610529
NC_036455.1	13	22042553	111610529
NC_036455.1	13	22042645	111610529
NC_036455.1	13	22042668	111610529
NC_036455.1	13	22042724	111610529
NC_036455.1	13	22042981	111610529
NC_036455.1	13	22042984	111610529
NC_036455.1	13	22043121	111610529
NC_036455.1	13	22043151	111610529
NC_036455.1	13	22050807	111610529
NC_036455.1	13	22050940	111610529
NC_036455.1	13	22051020	111610529
NC_036455.1	13	22051271	111610529
NC_036455.1	13	22051305	111610529
NC_036455.1	13	22087711
NC_036455.1	13	22103036
NC_036455.1	13	22106273
NC_036455.1	13	22107494
NC_036455.1	13	22109741
NC_036455.1	13	22151843
NC_036455.1	13	22298319
NC_036455.1	13	22298401
NC_036455.1	13	22303797
NC_036455.1	13	22304894
NC_036455.1	13	22305739
NC_036455.1	13	22307671
NC_036455.1	13	22308013
NC_036455.1	13	22308691
NC_036455.1	13	22312602
NC_036455.1	13	22394823
NC_036455.1	13	22411666
NC_036455.1	13	22854812
NC_036455.1	13	22855672
NC_036455.1	13	22856102
NC_036455.1	13	22856408
NC_036455.1	13	22887781
NC_036455.1	13	22887856
NC_036455.1	13	22887872
NC_036455.1	13	22889966
NC_036455.1	13	22891128
NC_036455.1	13	22897297
NC_036455.1	13	22898891
NC_036455.1	13	22924626
NC_036455.1	13	22952166
NC_036455.1	13	22952436
NC_036455.1	13	22954009
NC_036455.1	13	23079620
NC_036455.1	13	23084449
NC_036455.1	13	23116142
NC_036455.1	13	23116153
NC_036455.1	13	23117488
NC_036455.1	13	23124090
NC_036455.1	13	23219044
NC_036455.1	13	23219935
NC_036455.1	13	23220342
NC_036455.1	13	23220542
NC_036455.1	13	23227326
NC_036455.1	13	23227355
NC_036455.1	13	23281920
NC_036455.1	13	23282533
NC_036455.1	13	23283887
NC_036455.1	13	23298094
NC_036455.1	13	23317544
NC_036455.1	13	23317974
NC_036455.1	13	23328314
NC_036455.1	13	23337628
NC_036455.1	13	23346935
NC_036455.1	13	23374212
NC_036455.1	13	23380068
NC_036455.1	13	23420839
NC_036455.1	13	23441875
NC_036455.1	13	23443691
NC_036455.1	13	23443763
NC_036455.1	13	23469584
NC_036455.1	13	23483716
NC_036455.1	13	23486103
NC_036455.1	13	23493218
NC_036455.1	13	23495175
NC_036455.1	13	23529125
NC_036455.1	13	23537656
NC_036455.1	13	23538606
NC_036455.1	13	23646808
NC_036455.1	13	23681554
NC_036455.1	13	23685143
NC_036455.1	13	23685247
NC_036455.1	13	23688374
NC_036455.1	13	23705215
NC_036455.1	13	23707981
NC_036455.1	13	23714184
NC_036455.1	13	23743564
NC_036455.1	13	23743807
NC_036455.1	13	23744298
NC_036455.1	13	23744707
NC_036455.1	13	23745446
NC_036455.1	13	23745571
NC_036455.1	13	23747775
NC_036455.1	13	23747807
NC_036455.1	13	23747881
NC_036455.1	13	23748830
NC_036455.1	13	23749233
NC_036455.1	13	23750639
NC_036455.1	13	23751010
NC_036455.1	13	23751686
NC_036455.1	13	23752171
NC_036455.1	13	23752281
NC_036455.1	13	23752444
NC_036455.1	13	23752490
NC_036455.1	13	23752710
NC_036455.1	13	23753067
NC_036455.1	13	23753138
NC_036455.1	13	23753394
NC_036455.1	13	23755398
NC_036455.1	13	23756083
NC_036455.1	13	23756165
NC_036455.1	13	23759671
NC_036455.1	13	23759766
NC_036455.1	13	23759770
NC_036455.1	13	23759950
NC_036455.1	13	23762077
NC_036455.1	13	23763566
NC_036455.1	13	23765795
NC_036455.1	13	23765820
NC_036455.1	13	23765912
NC_036455.1	13	23765922
NC_036455.1	13	23766064
NC_036455.1	13	23766097
NC_036455.1	13	23769929
NC_036455.1	13	23769977
NC_036455.1	13	23788646
NC_036455.1	13	23792338
NC_036455.1	13	23792912
NC_036455.1	13	23796643
NC_036455.1	13	23805054
NC_036455.1	13	23849102
NC_036455.1	13	23867943
NC_036455.1	13	23868831
NC_036455.1	13	23870801
NC_036455.1	13	23913573
NC_036455.1	13	23914366
NC_036455.1	13	23914910
NC_036455.1	13	23915604
NC_036455.1	13	23916012
NC_036455.1	13	23916953
NC_036455.1	13	23933951
NC_036455.1	13	23934332
NC_036455.1	13	23934804
NC_036455.1	13	23947685
NC_036455.1	13	23947723
NC_036455.1	13	23962496
NC_036455.1	13	23962576
NC_036455.1	13	23962701
NC_036455.1	13	23962745
NC_036455.1	13	23964543
NC_036455.1	13	23965345
NC_036455.1	13	23965457
NC_036455.1	13	23965484
NC_036455.1	13	23965669
NC_036455.1	13	23965841
NC_036455.1	13	23966037
NC_036455.1	13	23966096
NC_036455.1	13	23966200
NC_036455.1	13	23966694
NC_036455.1	13	23966723
NC_036455.1	13	23966802
NC_036455.1	13	23966822
NC_036455.1	13	23967549
NC_036455.1	13	23967557
NC_036455.1	13	23968914
NC_036455.1	13	23972728
NC_036455.1	13	23978238
NC_036455.1	13	23987173
NC_036455.1	13	23989143
NC_036455.1	13	23990144
NC_036455.1	13	23990198
NC_036455.1	13	23990286
NC_036455.1	13	23990290
NC_036455.1	13	23990327
NC_036455.1	13	23990368
NC_036455.1	13	23990392
NC_036455.1	13	23994629
NC_036455.1	13	23994911
NC_036455.1	13	23995690
NC_036455.1	13	24002439
NC_036455.1	13	24005255
NC_036455.1	13	24008623
NC_036455.1	13	24016554
NC_036455.1	13	24017496
NC_036455.1	13	24017636
NC_036455.1	13	24043496
NC_036455.1	13	24055031
NC_036455.1	13	24207842
NC_036455.1	13	24208775
NC_036455.1	13	24209649
NC_036455.1	13	24360820
NC_036455.1	13	24361293
NC_036455.1	13	24362500
NC_036455.1	13	24362749
NC_036455.1	13	24362878
NC_036455.1	13	24364488
NC_036455.1	13	24365941
NC_036455.1	13	24393041
NC_036455.1	13	24399359
NC_036455.1	13	24399694
NC_036456.1	14	13753561
NC_036456.1	14	13754495
NC_036456.1	14	13754813
NC_036456.1	14	13759559
NC_036456.1	14	13759764
NC_036456.1	14	13764444
NC_036456.1	14	13766762
NC_036456.1	14	13766985
NC_036456.1	14	13768011
NC_036456.1	14	13769364
NC_036456.1	14	13769472
NC_036456.1	14	13863634
NC_036456.1	14	13863893
NC_036456.1	14	13863988
NC_036456.1	14	13864975
NC_036456.1	14	14304906
NC_036456.1	14	14305177
NC_036456.1	14	14343237
NC_036456.1	14	14344384
NC_036456.1	14	14344718
NC_036456.1	14	14398120
NC_036456.1	14	14438579
NC_036456.1	14	14469713
NC_036456.1	14	14487312
NC_036456.1	14	14602445
NC_036456.1	14	14603724
NC_036456.1	14	23618713
NC_036456.1	14	26356593
NC_036457.1	15	3096925	102216799
NC_036457.1	15	3099870	102216799
NC_036457.1	15	3126962	102216799
NC_036457.1	15	3126993	102216799
NC_036457.1	15	3130946	102216799
NC_036457.1	15	3131088	102216799
NC_036457.1	15	3131430	102216799
NC_036457.1	15	3131688	102216799
NC_036457.1	15	3132144	111611360
NC_036457.1	15	3138157
NC_036457.1	15	3138265
NC_036457.1	15	3138453
NC_036457.1	15	3138608
NC_036457.1	15	3138635
NC_036457.1	15	3139050
NC_036457.1	15	3139274
NC_036457.1	15	3139963
NC_036457.1	15	3140370
NC_036457.1	15	3140461
NC_036457.1	15	3140922
NC_036457.1	15	3140950
NC_036457.1	15	3141012
NC_036457.1	15	3141101
NC_036457.1	15	3141174
NC_036457.1	15	3141219
NC_036457.1	15	3141255
NC_036457.1	15	3141271
NC_036457.1	15	3142773
NC_036457.1	15	3143791
NC_036457.1	15	3147495
NC_036457.1	15	3148034
NC_036457.1	15	3149816
NC_036457.1	15	3150469
NC_036457.1	15	3153159
NC_036457.1	15	3154166
NC_036457.1	15	3290599
NC_036457.1	15	3300029	111611526
NC_036457.1	15	3330211
NC_036457.1	15	3332886
NC_036457.1	15	3342610
NC_036457.1	15	3348268
NC_036457.1	15	3349967
NC_036457.1	15	3349970
NC_036457.1	15	3349994
NC_036457.1	15	3361444
NC_036457.1	15	3439771	102216799
NC_036457.1	15	3439915	102216799
NC_036457.1	15	3439952	102216799
NC_036457.1	15	3440000	102216799
NC_036457.1	15	3440138	102216799
NC_036457.1	15	3440154	102216799
NC_036457.1	15	3440603	102221327
NC_036457.1	15	3440714	102221327
NC_036457.1	15	3440744	102221327
NC_036457.1	15	3440884	102221327
NC_036457.1	15	3440910	102221327
NC_036457.1	15	3440988	102221327
NC_036457.1	15	3440993	102221327
NC_036457.1	15	3441202	102221327
NC_036457.1	15	3441227	102221327
NC_036457.1	15	3441290	102221327
NC_036457.1	15	3441344	102221327
NC_036457.1	15	3441426	102221327
NC_036457.1	15	3441459	102221327
NC_036457.1	15	3441878	102221327
NC_036457.1	15	3441912	102221327
NC_036457.1	15	3442116	102221327
NC_036457.1	15	3442158	102221327
NC_036457.1	15	3442216	102221327
NC_036457.1	15	3442517	102221327
NC_036457.1	15	3443182	102221327
NC_036457.1	15	3443214	102221327
NC_036457.1	15	3444186
NC_036457.1	15	3459255
NC_036457.1	15	3459264
NC_036457.1	15	3459729
NC_036457.1	15	3460207
NC_036457.1	15	3460605
NC_036457.1	15	3460607
NC_036457.1	15	3460674
NC_036457.1	15	3465389
NC_036457.1	15	3466006
NC_036457.1	15	3467093
NC_036457.1	15	3467578
NC_036457.1	15	3467584
NC_036457.1	15	3467764
NC_036457.1	15	3467770
NC_036457.1	15	3467801
NC_036457.1	15	3467813
NC_036457.1	15	3569752
NC_036457.1	15	3569825
NC_036457.1	15	3572214
NC_036457.1	15	5230557
NC_036457.1	15	5230697
NC_036457.1	15	5235330
NC_036457.1	15	5244950
NC_036457.1	15	5245588
NC_036457.1	15	5245702
NC_036457.1	15	5247949
NC_036457.1	15	5249502
NC_036457.1	15	5249895
NC_036457.1	15	5250064
NC_036457.1	15	5250350
NC_036457.1	15	5255267
NC_036457.1	15	5257504
NC_036457.1	15	5257738
NC_036457.1	15	5258386
NC_036457.1	15	5258934
NC_036457.1	15	5258953
NC_036457.1	15	5259138
NC_036457.1	15	5259415
NC_036457.1	15	5272842
NC_036457.1	15	5273099
NC_036457.1	15	5312141	102216799
NC_036457.1	15	5312150	102216799
NC_036457.1	15	5320471	102216799
NC_036457.1	15	5320752	102216799
NC_036457.1	15	5321852	102216799
NC_036457.1	15	5321925	102216799
NC_036457.1	15	5322844	102216799
NC_036457.1	15	5322920	102216799
NC_036457.1	15	5323249	102216799
NC_036457.1	15	5323264	102216799
NC_036457.1	15	5323655	102216799
NC_036457.1	15	5323698	102216799
NC_036457.1	15	5325198	102231856
NC_036457.1	15	5326351	102231856
NC_036457.1	15	5329572
NC_036457.1	15	5399835
NC_036457.1	15	5403812
NC_036457.1	15	5403949
NC_036457.1	15	5405569
NC_036457.1	15	5408669
NC_036457.1	15	5424647
NC_036457.1	15	5424673
NC_036457.1	15	5426379
NC_036457.1	15	5426749
NC_036457.1	15	5432133	102220540
NC_036457.1	15	5432212	102220540
NC_036457.1	15	5432261	102220540
NC_036457.1	15	5441207	102216799
NC_036457.1	15	5441434	102220540
NC_036457.1	15	5441442	102220540
NC_036457.1	15	5441571	102220540
NC_036457.1	15	5443690	102220540
NC_036457.1	15	5444362
NC_036457.1	15	5444482
NC_036457.1	15	5446379
NC_036457.1	15	5448803
NC_036457.1	15	5448905
NC_036457.1	15	5449018
NC_036457.1	15	5457109
NC_036457.1	15	5457601
NC_036457.1	15	5461878
NC_036457.1	15	5462260
NC_036457.1	15	5466707
NC_036457.1	15	5485820
NC_036457.1	15	5486543
NC_036457.1	15	5486810
NC_036457.1	15	5488311
NC_036457.1	15	5489798
NC_036457.1	15	5489950
NC_036457.1	15	5490303
NC_036457.1	15	5494661
NC_036457.1	15	5497131
NC_036457.1	15	5497215
NC_036457.1	15	5532543
NC_036457.1	15	5578631
NC_036457.1	15	5587572
NC_036457.1	15	5592879
NC_036457.1	15	5596208
NC_036457.1	15	5597690
NC_036457.1	15	5696273
NC_036457.1	15	5699614
NC_036457.1	15	5708557
NC_036457.1	15	5708561
NC_036457.1	15	5714847
NC_036457.1	15	5731835
NC_036457.1	15	5743168
NC_036457.1	15	5744224
NC_036457.1	15	5744782
NC_036457.1	15	5748137
NC_036457.1	15	5772097
NC_036457.1	15	5790983
NC_036457.1	15	5792680
NC_036457.1	15	5799392
NC_036457.1	15	5799463
NC_036457.1	15	5799617
NC_036457.1	15	5799787
NC_036457.1	15	5800414
NC_036457.1	15	5802731
NC_036457.1	15	5803018
NC_036457.1	15	5803051
NC_036457.1	15	5803067
NC_036457.1	15	5803248
NC_036457.1	15	5803274
NC_036457.1	15	5803712
NC_036457.1	15	5804042
NC_036457.1	15	5804464
NC_036457.1	15	5804535
NC_036457.1	15	5915777
NC_036457.1	15	5915804
NC_036457.1	15	5922410
NC_036457.1	15	5986062
NC_036457.1	15	5986126
NC_036457.1	15	5986148
NC_036457.1	15	5986835
NC_036457.1	15	6001692
NC_036457.1	15	6020992
NC_036457.1	15	6026274
NC_036457.1	15	6042277
NC_036457.1	15	6044210
NC_036457.1	15	6045074
NC_036457.1	15	6046050
NC_036457.1	15	6046064
NC_036457.1	15	6050432
NC_036457.1	15	6051432
NC_036457.1	15	6051851
NC_036457.1	15	6052518
NC_036457.1	15	6052733
NC_036457.1	15	6052737
NC_036457.1	15	6052944
NC_036457.1	15	6053525
NC_036457.1	15	6055531
NC_036457.1	15	6061526
NC_036457.1	15	6061695
NC_036457.1	15	6061740
NC_036457.1	15	6081622
NC_036457.1	15	6081691
NC_036457.1	15	6081835
NC_036457.1	15	6081924
NC_036457.1	15	6081945
NC_036457.1	15	6082178
NC_036457.1	15	6082205
NC_036457.1	15	6082418
NC_036457.1	15	6082749
NC_036457.1	15	6082864
NC_036457.1	15	6083049
NC_036457.1	15	6083064
NC_036457.1	15	6083078
NC_036457.1	15	6083175
NC_036457.1	15	6083359
NC_036457.1	15	6083413
NC_036457.1	15	6084636
NC_036457.1	15	6088936
NC_036457.1	15	6090520
NC_036457.1	15	6090552
NC_036457.1	15	6090762
NC_036457.1	15	6122186
NC_036457.1	15	6194762
NC_036457.1	15	6204346
NC_036457.1	15	6209302
NC_036457.1	15	6209448
NC_036457.1	15	6212863
NC_036457.1	15	6228238
NC_036457.1	15	6275891
NC_036457.1	15	6282107
NC_036457.1	15	6284607
NC_036457.1	15	6305357
NC_036457.1	15	6306484
NC_036457.1	15	6350204
NC_036457.1	15	6375190
NC_036457.1	15	6406817
NC_036457.1	15	6747218
NC_036457.1	15	6781898
NC_036458.1	16	5939599
NC_036458.1	16	9676500
NC_036458.1	16	23393721
NC_036458.1	16	23404394
NC_036458.1	16	23404847
NC_036458.1	16	23405727
NC_036458.1	16	23410003
NC_036458.1	16	23412439
NC_036458.1	16	23432615	102218993
NC_036458.1	16	23447473	102218993
NC_036458.1	16	23447623	102218993
NC_036458.1	16	23527051
NC_036458.1	16	23530796
NC_036458.1	16	23531656
NC_036458.1	16	23539821
NC_036458.1	16	23611005
NC_036458.1	16	23611318
NC_036458.1	16	23688877
NC_036458.1	16	23689132
NC_036458.1	16	23689466
NC_036458.1	16	23690162
NC_036458.1	16	23690467
NC_036458.1	16	23691339
NC_036458.1	16	23691448
NC_036458.1	16	23691613
NC_036458.1	16	23692029
NC_036458.1	16	23692125
NC_036458.1	16	23692261
NC_036458.1	16	23692887
NC_036458.1	16	23693315
NC_036458.1	16	23695040
NC_036458.1	16	23695085
NC_036458.1	16	23695607
NC_036458.1	16	23695638
NC_036458.1	16	23696782
NC_036458.1	16	23697590
NC_036458.1	16	23698658
NC_036458.1	16	23699817
NC_036458.1	16	23701460
NC_036458.1	16	23701591
NC_036458.1	16	23701953
NC_036458.1	16	23702173
NC_036458.1	16	23702441
NC_036458.1	16	23702453
NC_036458.1	16	23703353
NC_036458.1	16	23707630
NC_036458.1	16	23714002
NC_036458.1	16	23715273
NC_036458.1	16	23716853
NC_036458.1	16	23717155
NC_036458.1	16	23717255
NC_036458.1	16	23718369
NC_036458.1	16	23719529
NC_036458.1	16	23719595
NC_036458.1	16	23722427
NC_036458.1	16	23722576
NC_036458.1	16	23722688
NC_036458.1	16	23722738
NC_036458.1	16	23722838
NC_036458.1	16	23723068
NC_036458.1	16	23723126
NC_036458.1	16	23724658
NC_036458.1	16	23724680
NC_036458.1	16	23724847
NC_036458.1	16	23724959
NC_036458.1	16	23725089
NC_036458.1	16	23725221
NC_036458.1	16	23725495
NC_036458.1	16	23725563
NC_036458.1	16	23725603
NC_036458.1	16	23725691
NC_036458.1	16	23725718
NC_036458.1	16	23725724
NC_036458.1	16	23725746
NC_036458.1	16	23725805
NC_036458.1	16	23725973
NC_036458.1	16	23726136
NC_036458.1	16	23726185
NC_036458.1	16	23726241
NC_036458.1	16	23726245
NC_036458.1	16	23726277
NC_036458.1	16	23726306
NC_036458.1	16	23726364
NC_036458.1	16	23726447
NC_036458.1	16	23726458
NC_036458.1	16	23726505
NC_036458.1	16	23726649
NC_036458.1	16	23726807
NC_036458.1	16	23726925
NC_036458.1	16	23727083
NC_036458.1	16	23727111
NC_036458.1	16	23727131
NC_036458.1	16	23727207
NC_036458.1	16	23752083
NC_036458.1	16	25617985
NC_036459.1	17	713340
NC_036459.1	17	5098516
NC_036459.1	17	7141710
NC_036459.1	17	15612955
NC_036459.1	17	17607203
NC_036459.1	17	17608065
NC_036459.1	17	17610005
NC_036459.1	17	17610306
NC_036459.1	17	17610403
NC_036459.1	17	17610539
NC_036459.1	17	17610834
NC_036459.1	17	17610880
NC_036459.1	17	17610919
NC_036459.1	17	17611008
NC_036459.1	17	17611288
NC_036459.1	17	17611317
NC_036459.1	17	17611383
NC_036459.1	17	17611389
NC_036459.1	17	17611699
NC_036459.1	17	17612055
NC_036459.1	17	17612201
NC_036459.1	17	17612214
NC_036459.1	17	17612256
NC_036459.1	17	17612388
NC_036459.1	17	17612465
NC_036459.1	17	17612480
NC_036459.1	17	17612737
NC_036459.1	17	17613102
NC_036459.1	17	17613131
NC_036459.1	17	17613261
NC_036459.1	17	17613366
NC_036459.1	17	17613543
NC_036459.1	17	17613548
NC_036459.1	17	17613607
NC_036459.1	17	17613691
NC_036459.1	17	17613729
NC_036459.1	17	17614168
NC_036459.1	17	17614311
NC_036459.1	17	17615591
NC_036459.1	17	17615597
NC_036459.1	17	17616378
NC_036459.1	17	17616603
NC_036459.1	17	17616666
NC_036459.1	17	17616686
NC_036459.1	17	17616929
NC_036459.1	17	17618045
NC_036459.1	17	17618074
NC_036459.1	17	17618255
NC_036459.1	17	17618264
NC_036459.1	17	17618329
NC_036459.1	17	17618336
NC_036459.1	17	17618615
NC_036459.1	17	17619569
NC_036459.1	17	17619626
NC_036459.1	17	17619816
NC_036459.1	17	17619834
NC_036459.1	17	17619906
NC_036459.1	17	17619924
NC_036459.1	17	17620995
NC_036459.1	17	17621513
NC_036459.1	17	17621557
NC_036459.1	17	17621630
NC_036459.1	17	17621688
NC_036459.1	17	17622670
NC_036459.1	17	17622680
NC_036459.1	17	17622704
NC_036459.1	17	17622737
NC_036459.1	17	17622861
NC_036459.1	17	17623295
NC_036459.1	17	17623562
NC_036459.1	17	17625413
NC_036459.1	17	17625558
NC_036459.1	17	17625640
NC_036459.1	17	17683119
NC_036459.1	17	17688077
NC_036459.1	17	17690809
NC_036459.1	17	17692063
NC_036459.1	17	17696040
NC_036459.1	17	17706661
NC_036459.1	17	17706948
NC_036459.1	17	17708640
NC_036459.1	17	17708725
NC_036459.1	17	17710209
NC_036459.1	17	17711376
NC_036459.1	17	17711398
NC_036459.1	17	17712681
NC_036459.1	17	17712723
NC_036459.1	17	17712847
NC_036459.1	17	17713207
NC_036459.1	17	17713230
NC_036459.1	17	17713251
NC_036459.1	17	17713309
NC_036459.1	17	17713313
NC_036459.1	17	17713487
NC_036459.1	17	17713754
NC_036459.1	17	17713946
NC_036459.1	17	17713953
NC_036459.1	17	17714580
NC_036459.1	17	17714641
NC_036459.1	17	17714718
NC_036459.1	17	17714791
NC_036459.1	17	17714886
NC_036459.1	17	17715078
NC_036459.1	17	17715116
NC_036459.1	17	17715209
NC_036459.1	17	17715215
NC_036459.1	17	17715286
NC_036459.1	17	17716015
NC_036459.1	17	17716196
NC_036459.1	17	17716211
NC_036459.1	17	17716237
NC_036459.1	17	17716356
NC_036459.1	17	17716358
NC_036459.1	17	17721868
NC_036459.1	17	17723727
NC_036459.1	17	17772217
NC_036459.1	17	17772647
NC_036459.1	17	17774065
NC_036459.1	17	17812779
NC_036459.1	17	17815608
NC_036459.1	17	17815681
NC_036459.1	17	17816278
NC_036459.1	17	17816587
NC_036459.1	17	17816616
NC_036459.1	17	17817323
NC_036459.1	17	17818836
NC_036459.1	17	17819093
NC_036459.1	17	17819279
NC_036459.1	17	17819306
NC_036459.1	17	17819489
NC_036459.1	17	17843589
NC_036459.1	17	17845162
NC_036459.1	17	17850428
NC_036459.1	17	17869175
NC_036459.1	17	17888678
NC_036459.1	17	18013916
NC_036459.1	17	18013923
NC_036459.1	17	18031419
NC_036459.1	17	18039274
NC_036459.1	17	18044897
NC_036459.1	17	18048027
NC_036459.1	17	18056827
NC_036459.1	17	18057360
NC_036459.1	17	18057366
NC_036459.1	17	18058925
NC_036459.1	17	18059425
NC_036459.1	17	18065263
NC_036459.1	17	18065624
NC_036459.1	17	18065639
NC_036459.1	17	18065814
NC_036459.1	17	18066062
NC_036459.1	17	18066102
NC_036459.1	17	18067070
NC_036459.1	17	18067972
NC_036459.1	17	18068076
NC_036459.1	17	18068805
NC_036459.1	17	18068811
NC_036459.1	17	18069141
NC_036459.1	17	18069163
NC_036459.1	17	18069231
NC_036459.1	17	18069427
NC_036459.1	17	18069504
NC_036459.1	17	18069652
NC_036459.1	17	18069769
NC_036459.1	17	18069823
NC_036459.1	17	18069904
NC_036459.1	17	18070469
NC_036459.1	17	18070602
NC_036459.1	17	18070765
NC_036459.1	17	18070791
NC_036459.1	17	18070836
NC_036459.1	17	18071683
NC_036459.1	17	18071729
NC_036459.1	17	18071980
NC_036459.1	17	18072082
NC_036459.1	17	18072186
NC_036459.1	17	18072886
NC_036459.1	17	18073531
NC_036459.1	17	18074433
NC_036459.1	17	18074761
NC_036459.1	17	18074870
NC_036459.1	17	18074953
NC_036459.1	17	18075999
NC_036459.1	17	18077600
NC_036459.1	17	18077601
NC_036459.1	17	18077838
NC_036459.1	17	18347656
NC_036459.1	17	19282974
NC_036461.1	19	23616189
NC_036461.1	19	23694981
[truncated: 1,294 more rows]
